# Supplementary material
Source: HighWire-hosted journal article supplement (https://bmjopen.bmj.com/content/12/10/e066327)
Supplement: inline-supplementary-material-2 [file inline-supplementary-material-2.pdf]

# Living systematic review and meta-analysis of the prostate MRI diagnostic test with PI-RADS (Prostate Imaging Reporting and Data System) assessment for the detection of prostate cancer: Study protocol

## Search strategies

| database                              | url                                                                                                           | search                                                                                                                                                                                                                          |
|---------------------------------------|---------------------------------------------------------------------------------------------------------------|---------------------------------------------------------------------------------------------------------------------------------------------------------------------------------------------------------------------------------|
| MEDLINE                               | <a href="https://pubmed.ncbi.nlm.nih.gov/">https://pubmed.ncbi.nlm.nih.gov/</a>                               | ((PIRADS) OR ("PI-RADS") OR ("prostate imaging reporting and data system")) AND ("2019/03/01" [Date - Publication]: "3000/12/12" [Date - Publication])                                                                          |
| Embase                                | <a href="https://www.embase.com/lookup/status=grey">https://www.embase.com/lookup/status=grey</a>             | (PIRADS OR "PI-RADS" OR "prostate imaging reporting and data system") AND [2019-2022]/py<br><br>All article types considered but conference abstracts.                                                                          |
| Cochrane Library                      | <a href="https://www.cochranelibrary.com/advanced-search">https://www.cochranelibrary.com/advanced-search</a> | PIRADS OR "PI-RADS" OR "prostate imaging reporting and data system"<br><br>date limit: with Cochrane Library publication date from Mar 2019 to date of search (search limit)                                                    |
| ISRCTN                                | <a href="https://www.isrctn.com/editAdvancedSearch">https://www.isrctn.com/editAdvancedSearch</a>             | PIRADS OR "PI-RADS" OR "prostate imaging reporting and data system";<br>search in "text search" field.<br><br>date limit: filter from 03/2019 to date of search                                                                 |
| ClinicalTrials.gov                    | <a href="https://clinicaltrials.gov/ct2/search/advanced">https://clinicaltrials.gov/ct2/search/advanced</a>   | PIRADS OR "PI-RADS" (synonym "prostate imaging reporting and data system is automatically included", doublecheck is performed);<br>search in "other terms" field.<br><br>date limit: study start from 03/2019 to date of search |
| ICTRP                                 | <a href="https://trialsearch.who.int/Default.aspx">https://trialsearch.who.int/Default.aspx</a>               | PIRADS OR "PI-RADS" OR "prostate imaging reporting and data system" ;<br>search in "standard search".<br><br>date limit: date of registration from 03/2019 to date of search                                                    |
| Deutsches Register Klinischer Studien | <a href="https://www.drks.de/drks_web/">https://www.drks.de/drks_web/</a>                                     | PIRADS OR "PI-RADS" OR "prostate imaging reporting and data system"<br><br>date limit: date of registration from 03/2019 to date of search                                                                                      |
